# Supplementary material for: Comparing Ocular Toxicity of Legacy and Alternative Per- and Polyfluoroalkyl Substances in Zebrafish Larvae
Source: MDPI journal article supplement (doi:10.3390/toxics11121021), 2023-12-14
Supplement: s1 [file s1]

# Supplementary Materials: Comparing Ocular Toxicity of Legacy and Alternative Per- and Polyfluoroalkyl Substances in Zebrafish Larvae

Han-seul Lee, Soogyong Jang, Youngsub Eom and Ki-Tae Kim

**Table S1.** The primers of qRT-PCR.

| Gene              | Accession ID   | Sequence (5' - 3')                                        |
|-------------------|----------------|-----------------------------------------------------------|
| <i>beta-actin</i> | NM_181601.5    | F: CGAGCTGTCTTCCCATCCA<br>R: TCACCAACGTAGCTGTCTTTCTG      |
| <i>rho</i>        | NM_131084      | F: TCACAGTCCTGCCCAGACAT<br>R: AGAATGCCGGTCCCTCTGTA        |
| <i>opsn1sw2</i>   | NM_131192      | F: TCACAGTCCTGCCCAGACAT<br>R: GAATACGCCACTGTGTCCCA        |
| <i>opn1mw1</i>    | NM_131253      | F: ACTGCTCACTTGTGGGCTAC<br>R: ACCTGACCTCCAAGTGTTC         |
| <i>opn1lw1</i>    | NM_001313715.1 | F: GCCGAGAAGGAAGTGTCCAGAATG<br>R: AAGCAGGCGAAGAACGTGTAAGG |
| <i>rcvrn3</i>     | NM_200825.2    | F: GTCCTACAGGTCGCATCACA<br>R: AAACGTGTTGGGCGTAAGTG        |
| <i>arr3a</i>      | NM_001002405.1 | F: CCTCATGGTATCAGGCGGAG<br>R: AGTCTTTGGGTTTGGGGTGC        |
| <i>arr3b</i>      | NM_200792.1    | F: CCACGTGGAAGCGTTGATT<br>R: CTCGTCCATAGCGAAAGGCA         |
| <i>crx</i>        | NM_152940.1    | F: GGTCAGCCCTCTTCCTACAG<br>R: CATGGGAGAAAGGTACGGGC        |
| <i>gnat2</i>      | NM_131869.2    | F: CTGGTGAAGCTGCCACAGTA<br>R: GCACACTTGACTGCTTGCTG        |
| <i>pde6ha</i>     | NM_001305554   | F: GACCACTCGCACCTTCAAGA<br>R: ACAGTGATGTCTGTGCCGAG        |
| <i>cnga1b</i>     | XM_695944.9    | F: TGTACCCGGACCCCTTCAGAT<br>R: CGATGGTAGTGAGCGTCAGG       |
| <i>guca1d</i>     | NM_001011661.1 | F: TCCGTCAGGCCTCATCACT<br>R: AAACGTGTTGGGCGTAAGTG         |
| <i>guca1e</i>     | NM_200656.1    | F: CCTCATGGTATCAGGCGGAG<br>R: CTGGAGGATTTTGTGCGTTCA       |
| <i>gucy2d</i>     | NM_131866.1    | F: CATCAGCTGAAGAGGTTTCTCC<br>R: ATACCCATCGCCCACTCTC       |

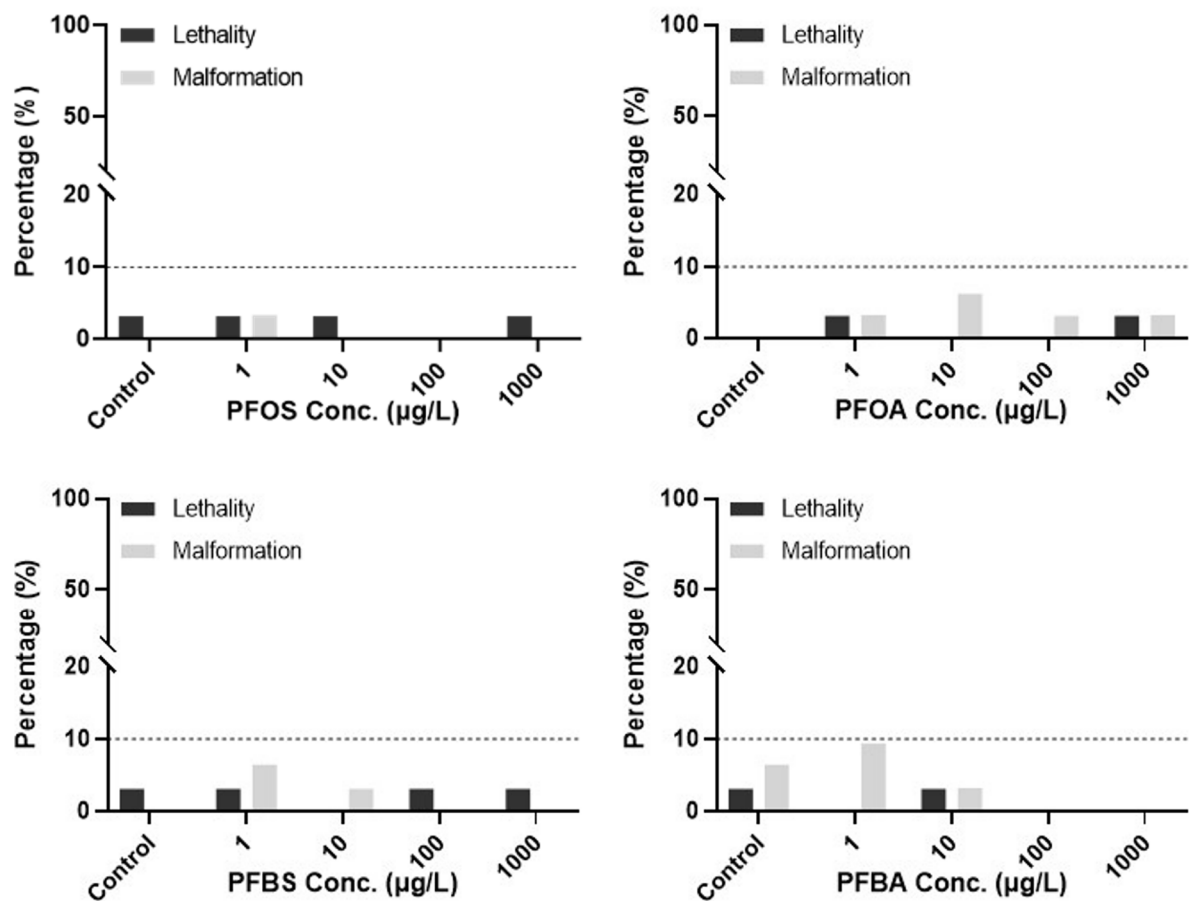

Figure S1. Lethality and malformation of larval zebrafish ( $n = 32$ ).

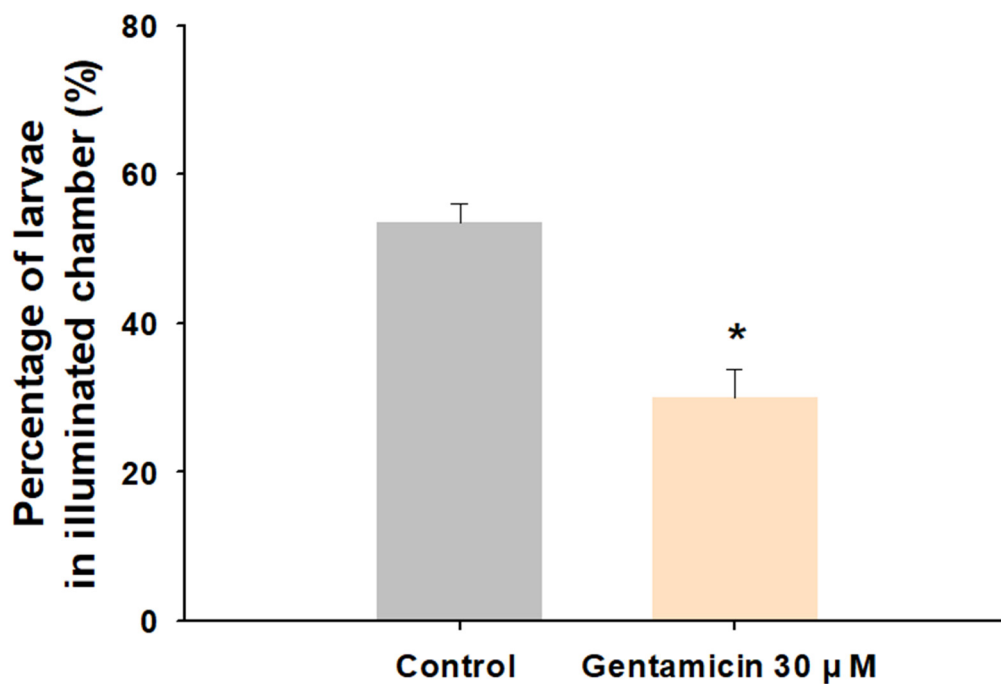

Figure S2. Phototactic response of zebrafish larvae exposed to Gentamicin at 30  $\mu\text{M}$ . Significance was denoted by  $*p < 0.05$ .

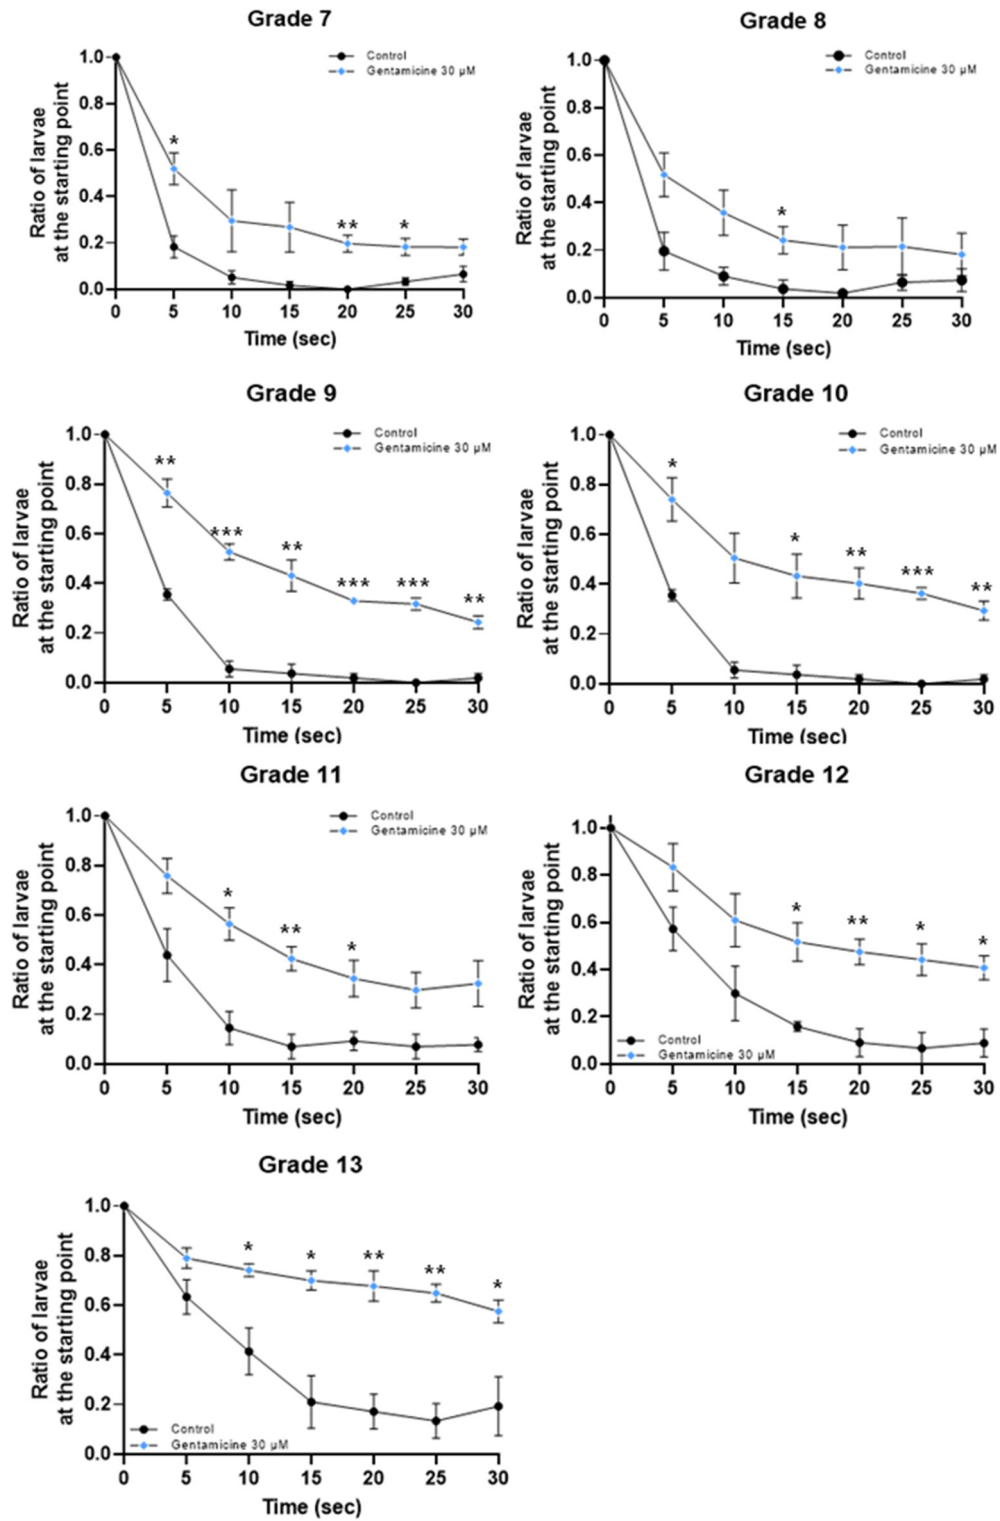

**Figure S3.** The ratio of larvae at the starting point curve after exposure to Gentamicin at 30 µM. Significance was denoted by \* $p < 0.05$ , \*\* $p < 0.01$ , and \*\*\* $p < 0.001$ .

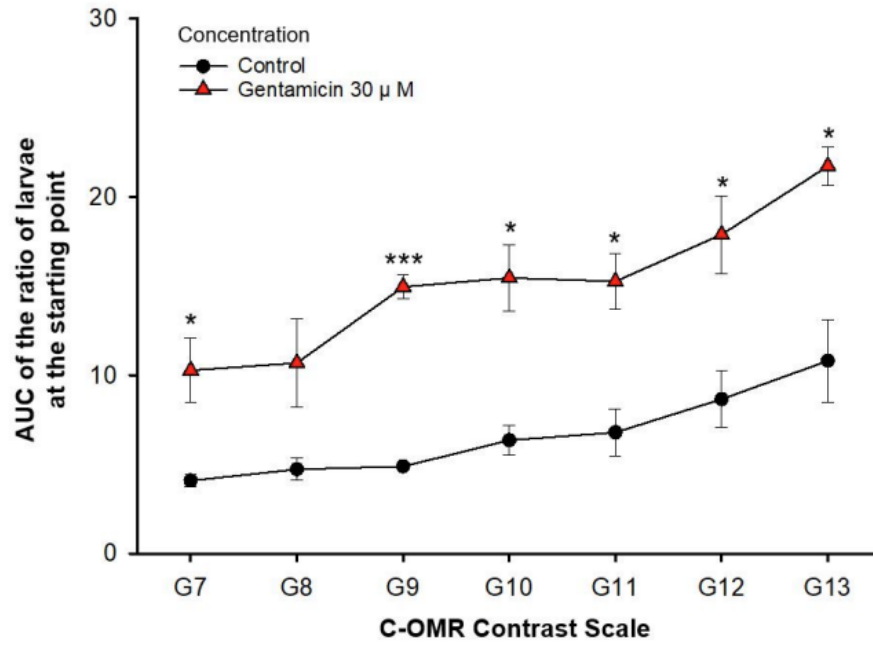

**Figure S4.** The area under the curve (AUC) of the ratio of larvae at the starting point curve after exposure to Gentamicin at 30 µM. Significance was denoted by \* $p < 0.05$ , \*\* $p < 0.01$ , and \*\*\* $p < 0.001$ .

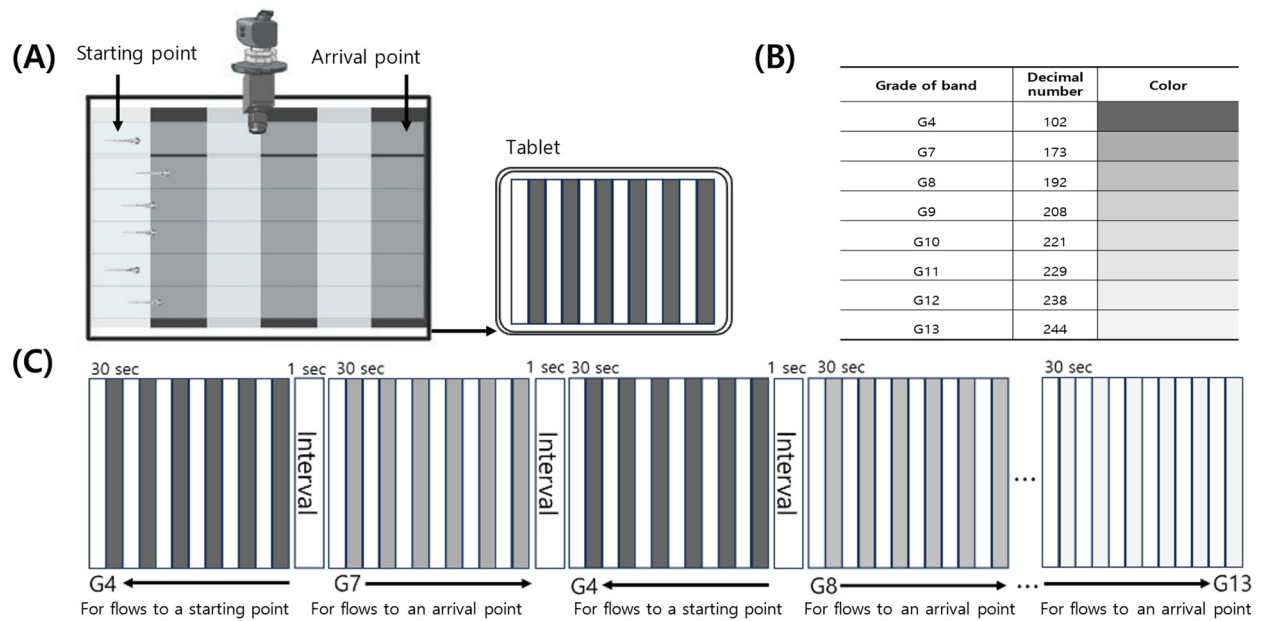

**Figure S5.** (A) Illustration of the swimming tray with six swimming lanes for zebrafish larvae with video recording system. (B) Graded color classes. (C) Order of playback on a tablet in the G4, G7–G13 gray band for contrast-optomotor response assay.
